# Supplementary material for: Identification of Vulnerable Populations and Areas at Higher Risk of COVID-19-Related Mortality during the Early Stage of the Epidemic in the United States
Source: MDPI journal article supplement (doi:10.3390/ijerph18084021), 2021-04-12
Supplement: s1 [file s1]

# Supplementary Materials

## Supplementary Material 1: STROBE checklist

TableS1. Strobe checklist.

| STROBE item          | Item No | Recommendation                                                                                                                           | Location in manuscript where items are reported               |
|----------------------|---------|------------------------------------------------------------------------------------------------------------------------------------------|---------------------------------------------------------------|
| Title and abstract   | 1       | (a) Indicate the study's design with a commonly used term in the title or the abstract                                                   | (a) Both in title and abstract (methods and findings section) |
|                      |         | (b) Provide in the abstract an informative and balanced summary of what was done and what was found                                      | (b) This was done                                             |
| Introduction         |         |                                                                                                                                          |                                                               |
| Background/rationale | 2       | Explain the scientific background and rationale for the investigation being reported                                                     | Introduction, paragraph 1, 2                                  |
| Objectives           | 3       | State specific objectives, including any prespecified hypotheses                                                                         | Introduction, paragraph 2                                     |
| Methods              |         |                                                                                                                                          |                                                               |
| Study design         | 4       | Present key elements of study design early in the paper                                                                                  | Methods, paragraph 1-3                                        |
| Setting              | 5       | Describe the setting, locations, and relevant dates, including periods of recruitment, exposure, follow-up, and data collection          | Methods, paragraph 1                                          |
| Participants         | 6       | (a) Give the eligibility criteria, and the sources and methods of selection of participants                                              | Methods, paragraph 2                                          |
| Variables            | 7       | Clearly define all outcomes, exposures, predictors, potential confounders, and effect modifiers. Give diagnostic criteria, if applicable | Methods, paragraph 2-3                                        |

|                           |     |                                                                                                                                                                                                                                                                                                                                            |                                  |
|---------------------------|-----|--------------------------------------------------------------------------------------------------------------------------------------------------------------------------------------------------------------------------------------------------------------------------------------------------------------------------------------------|----------------------------------|
| Data sources/ measurement | 8*  | For each variable of interest, give sources of data and details of methods of assessment (measurement). Describe comparability of assessment methods if there is more than one group                                                                                                                                                       |                                  |
| Bias                      | 9   | Describe any efforts to address potential sources of bias                                                                                                                                                                                                                                                                                  |                                  |
| Study size                | 10  | Explain how the study size was arrived at                                                                                                                                                                                                                                                                                                  | Appendix A                       |
| Quantitative variables    | 11  | Explain how quantitative variables were handled in the analyses. If applicable, describe which groupings were chosen and why                                                                                                                                                                                                               | Methods, paragraph 3. Appendix A |
| Statistical methods       | 12  | (a) Describe all statistical methods, including those used to control for confounding<br>(b) Describe any methods used to examine subgroups and interactions<br>(c) Explain how missing data were addressed<br>(d) If applicable, describe analytical methods taking account of sampling strategy<br>(e) Describe any sensitivity analyses | Methods, paragraph 4             |
| <hr/>                     |     |                                                                                                                                                                                                                                                                                                                                            |                                  |
| Participants              | 13* | Results<br>(a) Report numbers of individuals at each stage of study—eg numbers potentially eligible, examined for eligibility, confirmed eligible, included in the study, completing follow-up, and analyzed                                                                                                                               | Results, paragraph 1             |

|                  |     |                                                                                                                                                                                                                                                                                                                                                                                                               |                                     |
|------------------|-----|---------------------------------------------------------------------------------------------------------------------------------------------------------------------------------------------------------------------------------------------------------------------------------------------------------------------------------------------------------------------------------------------------------------|-------------------------------------|
|                  |     | (b) Give reasons for non-participation at each stage<br>(c) Consider use of a flow diagram                                                                                                                                                                                                                                                                                                                    | Appendix A                          |
| Descriptive data | 14* | (a) Give characteristics of study participants (eg demographic, clinical, social) and information on exposures and potential confounders<br>(b) Indicate number of participants with missing data for each variable of interest<br>Report numbers of outcome events or summary measures                                                                                                                       | Results, paragraph 1                |
| Outcome data     | 15* | (a) Give unadjusted estimates and, if applicable, confounder-adjusted estimates and their precision (eg, 95% confidence interval). Make clear which confounders were adjusted for and why they were included<br>(b) Report category boundaries when continuous variables were categorized<br>(c) If relevant, consider translating estimates of relative risk into absolute risk for a meaningful time period | Results, table 1                    |
| Main results     | 16  | Report other analyses done—eg analyses of subgroups and interactions, and sensitivity analyses                                                                                                                                                                                                                                                                                                                | Results, paragraph 2.<br>Appendix B |
| Other analyses   | 17  |                                                                                                                                                                                                                                                                                                                                                                                                               | NA                                  |
|                  |     |                                                                                                                                                                                                                                                                                                                                                                                                               | NA                                  |
|                  |     | Discussion                                                                                                                                                                                                                                                                                                                                                                                                    |                                     |
| Key results      | 18  | Summarize key results with reference to study objectives                                                                                                                                                                                                                                                                                                                                                      | Discussion, paragraph 1             |
| Limitations      | 19  | Discuss limitations of the study, taking into account sources of                                                                                                                                                                                                                                                                                                                                              | Discussion, paragraph 5             |

|                   |    |                                                                                                                                                                                                                                                                                    |                                            |
|-------------------|----|------------------------------------------------------------------------------------------------------------------------------------------------------------------------------------------------------------------------------------------------------------------------------------|--------------------------------------------|
| Interpretation    | 20 | <p>potential bias or imprecision. Discuss both direction and magnitude of any potential bias</p> <p>Give a cautious overall interpretation of results considering objectives, limitations, multiplicity of analyses, results from similar studies, and other relevant evidence</p> | Discussion, paragraph 1-4                  |
| Generalizability  | 21 | Discuss the generalizability (external validity) of the study results                                                                                                                                                                                                              | Discussion, paragraph 6                    |
| Other information |    |                                                                                                                                                                                                                                                                                    |                                            |
| Funding           | 22 | Give the source of funding and the role of the funders for the present study and, if applicable, for the original study on which the present article is based                                                                                                                      | Mentioned in the acknowledgements section. |

### Supplementary Material 2: Covariate selection criteria and definitions

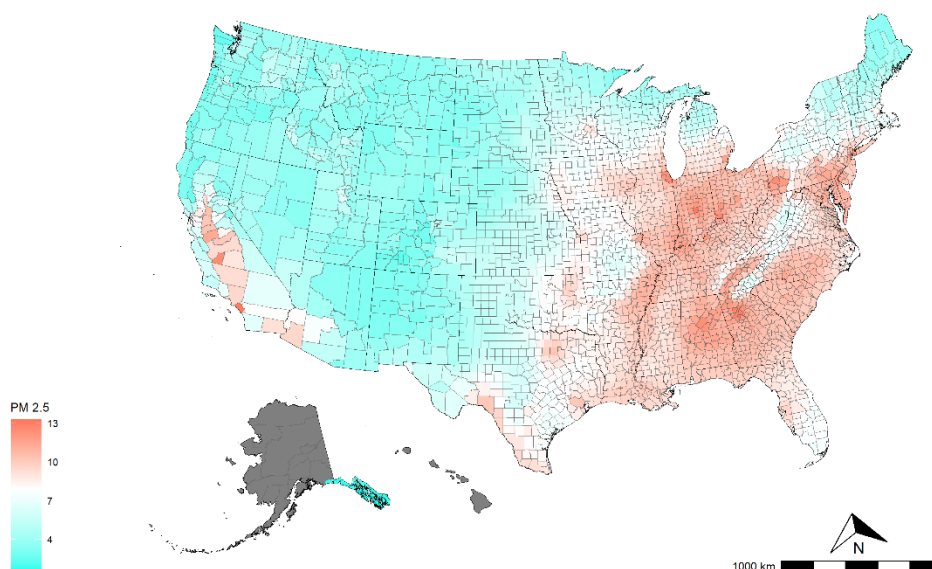

**Figure S1.** U.S. 2000 to 2018 Long-Term Mean PM<sub>2.5</sub> Concentrations by County, mean=7.98 µg/m (range is 1.42-13.30).

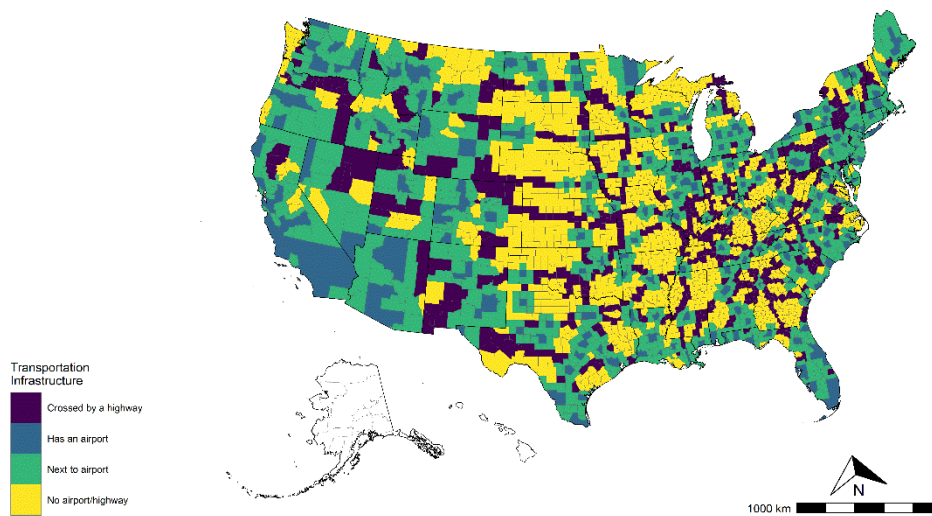

**Figure S2.** U.S. Connectivity index by county.

All covariates were selected according to an evidence synthesis process of relevant references [1–6].

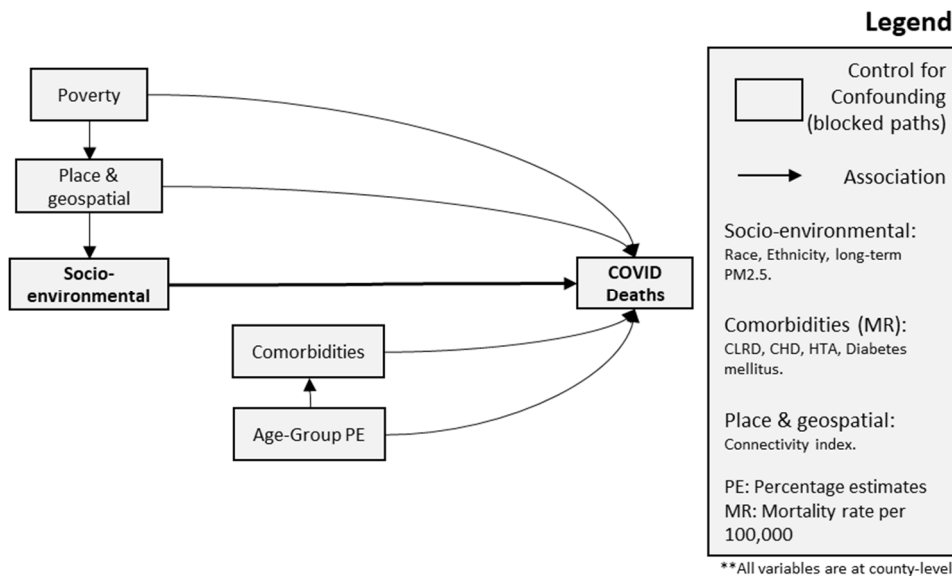

**Figure S3.** Directed acyclic graph for Coronavirus Disease 2019 (COVID-19) mortality.

The following variables were obtained from the 2014-2018 American Community Survey.

**Age:** Percent estimate of the population in the following age groups: under 25 years, 25 to 34 years, 35 to 44 years, 45 to 59 years, 60 to 74 years, over 75 years. Variable names: DP05\_0005PE, DP05\_0006PE, DP05\_0007PE, DP05\_0008PE, DP05\_0009PE, DP05\_0010PE, DP05\_0012PE, DP05\_0013PE, DP05\_0014PE, DP05\_0015PE, DP05\_0016PE, DP05\_0017PE.

**Poverty:** According to the U.S. Census Bureau, the income money threshold and the consumer Price Index (CPI-U). If a family's total income is less than the family's threshold, then every individual of that family is considered in poverty [7]. Variable name: S0601\_C01\_049E.

**Race:** Percent estimate of white, black. Variable names: DP05\_0037PE, DP05\_0038PE.

Ethnicity: Hispanic or Latino origin or not. Percent estimate of Hispanic or Latino population. Variable names: DP05\_0071P.

Underlying cause of death: Four COVID-related underlying cause of death including Chronic lower respiratory diseases (ICD-10: J40-J47), diabetes mellitus (ICD-10: E10-E14), hypertensive diseases (ICD-10: I10-I15), and ischemic heart diseases (ICD-10: I20-I25) were extracted from the CDC Wonder database using the ICD-10 standard code [8].

PM2.5: For the exposure estimates, PM2.5 cross-validated exposure estimates were produced by van Donekelaar et al [9].

**Table S2.** State Abbreviations List.

| <b>State</b>   | <b>Abbreviation</b> |
|----------------|---------------------|
| ALABAMA        | AL                  |
| ALASKA         | AK                  |
| ARIZONA        | AZ                  |
| ARKANSAS       | AR                  |
| CALIFORNIA     | CA                  |
| COLORADO       | CO                  |
| CONNECTICUT    | CT                  |
| DELAWARE       | DE                  |
| FLORIDA        | FL                  |
| GEORGIA        | GA                  |
| HAWAII         | HI                  |
| IDAHO          | ID                  |
| ILLINOIS       | IL                  |
| INDIANA        | IN                  |
| IOWA           | IA                  |
| KANSAS         | KS                  |
| KENTUCKY       | KY                  |
| LOUISIANA      | LA                  |
| MAINE          | ME                  |
| MARYLAND       | MD                  |
| MASSACHUSETTS  | MA                  |
| MICHIGAN       | MI                  |
| MINNESOTA      | MN                  |
| MISSISSIPPI    | MS                  |
| MISSOURI       | MO                  |
| MONTANA        | MT                  |
| NEBRASKA       | NE                  |
| NEVADA         | NV                  |
| NEW HAMPSHIRE  | NH                  |
| NEW JERSEY     | NJ                  |
| NEW MEXICO     | NM                  |
| NEW YORK       | NY                  |
| NORTH CAROLINA | NC                  |
| NORTH DAKOTA   | ND                  |
| OHIO           | OH                  |
| OKLAHOMA       | OK                  |
| OREGON         | OR                  |
| PENNSYLVANIA   | PA                  |
| RHODE ISLAND   | RI                  |
| SOUTH CAROLINA | SC                  |
| SOUTH DAKOTA   | SD                  |
| TENNESSEE      | TN                  |

|               |    |
|---------------|----|
| TEXAS         | TX |
| UTAH          | UT |
| VERMONT       | VT |
| VIRGINIA      | VA |
| WASHINGTON    | WA |
| WEST VIRGINIA | WV |
| WISCONSIN     | WI |
| WYOMING       | WY |

---

**Supplementary Material 3: Bayesian spatial model**

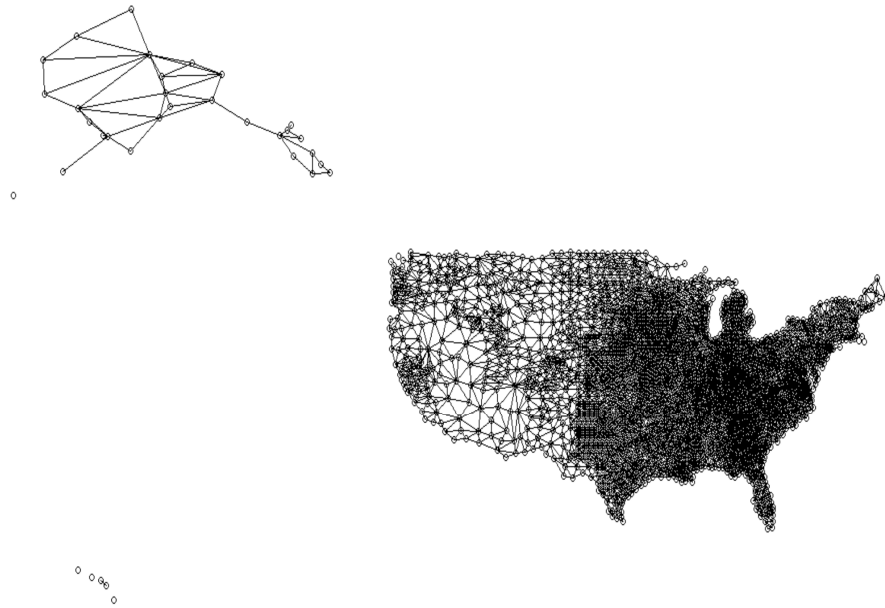

**Figure S4.** U.S. counties adjacency matrix for the intrinsic CAR model.

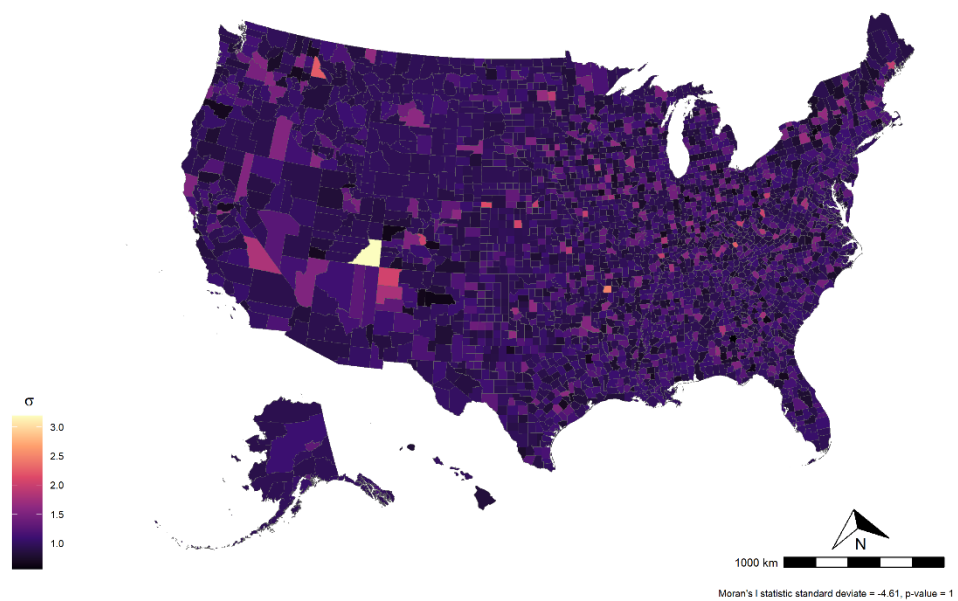

**Figure S5.** Bayesian spatial random effects ( $\sigma$ ), Moran's I statistic standard deviate = -4.61, p-value = 1. We used the following Bayesian multilevel spatial regression model to estimate relative risks of COVID-related mortality at the county level.

$$\text{Number of COVID19}_{\text{deaths}} \sim \text{Poisson}(E * \theta), \quad (1)$$

where E denotes the expected number of deaths in the county,  $\theta$  is the relative risk, and

$$\log(\theta) = \beta_0 + \beta_1 PM_{2.5} + \beta_3 Age_{25-34} + \beta_4 Age_{35-44} + \beta_5 Age_{35-44} + Age_{45-59} + \beta_7 Age_{60-74} + \beta_8 Age_{75+} + \beta_9 Black + \beta_{10} Other Races + \beta_{10} Hispanic + \beta_{11} CLRD + \beta_{12} Diabetes + \beta_{13} HTA + \beta_{14} IHD + \beta_{15} Connectivity + \sigma_j, \quad (2)$$

Independent  $n(0,10)$  priors for each regression coefficient ( $\beta$ )

$$\sigma_j \sim \text{halfCauchy}(0,2), j = 1, \dots, 50 \text{ states} + D, C, \quad (3)$$

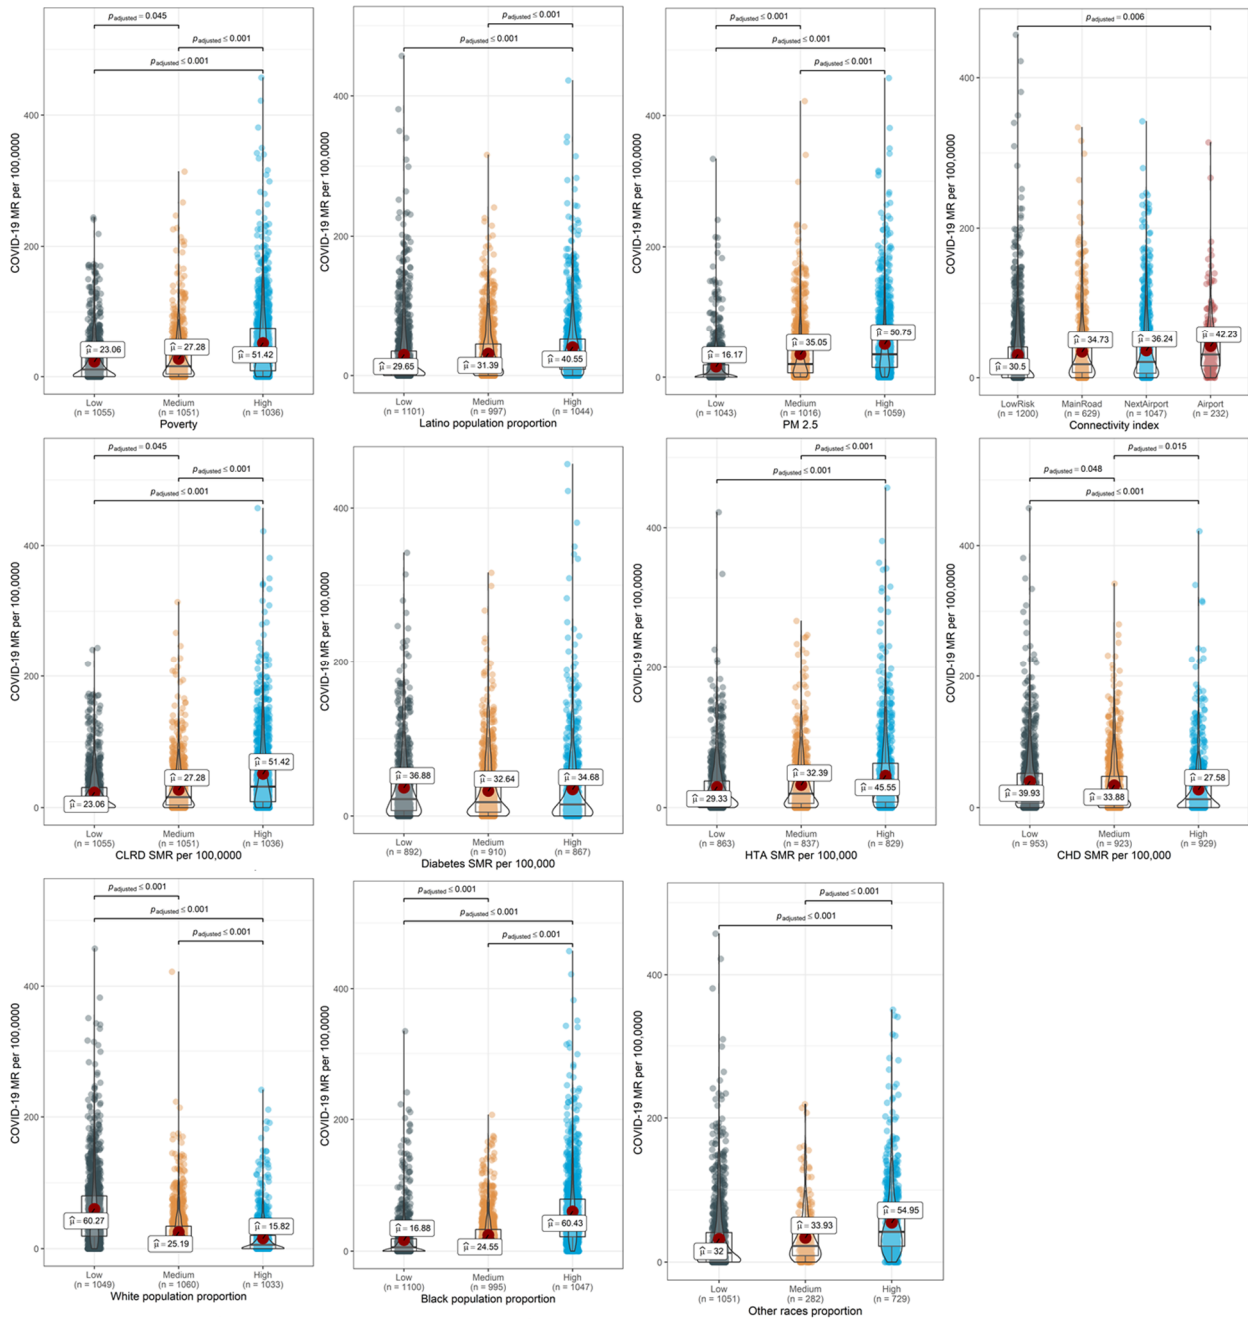



**FigureS6.** Exploratory data analysis covariates vs COVID-19 mortality rate.

**Table S3.** State summary for sociodemographic factors.

| STAT E | White (%) | Black (%) | Other Races (%) | Latino (%) | Poverty (%) | PM2.5 (u/gml) | ICU per 100,000 |
|--------|-----------|-----------|-----------------|------------|-------------|---------------|-----------------|
| AK     | 50.8      | 1.3       | 47.9            | 5.2        | 13.3        | 1.8           | NaN             |
| AL     | 67.0      | 28.9      | 4.1             | 3.4        | 20.3        | 10.9          | 26.6            |
| AR     | 78.2      | 16.2      | 5.6             | 5.2        | 19.8        | 9.0           | 22.4            |
| AZ     | 74.6      | 2.0       | 23.4            | 31.1       | 20.0        | 5.0           | 23.6            |
| CA     | 73.9      | 3.1       | 23.0            | 30.3       | 15.0        | 6.8           | 19.6            |
| CO     | 90.7      | 1.6       | 7.7             | 20.1       | 13.1        | 4.0           | 28.1            |
| CT     | 82.3      | 7.1       | 10.7            | 11.7       | 9.2         | 8.0           | 20.4            |
| DC     | 41.0      | 46.9      | 12.1            | 10.9       | 16.8        | 12.0          | 59.5            |
| DE     | 71.0      | 20.9      | 8.1             | 8.6        | 12.2        | 11.2          | 24.4            |
| FL     | 79.1      | 14.5      | 6.4             | 14.0       | 16.6        | 8.9           | 25.3            |
| GA     | 66.0      | 28.4      | 5.6             | 6.3        | 20.7        | 10.6          | 22.5            |
| HI     | 28.8      | 1.4       | 69.8            | 9.5        | 10.8        | NaN           | NaN             |
| IA     | 94.4      | 1.4       | 4.1             | 4.7        | 11.1        | 8.3           | 31.3            |
| ID     | 91.8      | 0.3       | 7.9             | 12.8       | 15.0        | 4.5           | 22.8            |
| IL     | 90.2      | 5.3       | 4.5             | 4.9        | 13.6        | 9.9           | 20.9            |
| IN     | 93.0      | 2.8       | 4.2             | 4.0        | 12.9        | 11.0          | 20.4            |
| KS     | 91.9      | 1.9       | 6.2             | 9.9        | 12.3        | 6.5           | 70.5            |
| KY     | 93.2      | 3.6       | 3.2             | 2.4        | 21.0        | 10.1          | 23.1            |
| LA     | 63.8      | 32.0      | 4.2             | 3.6        | 22.0        | 9.4           | 37.8            |
| MA     | 83.2      | 6.2       | 10.6            | 9.1        | 10.7        | 7.4           | 24.1            |
| MD     | 71.3      | 20.2      | 8.5             | 6.0        | 10.4        | 10.7          | 15.8            |
| ME     | 95.2      | 0.9       | 3.9             | 1.5        | 13.8        | 4.7           | 21.2            |
| MI     | 90.4      | 3.9       | 5.7             | 3.5        | 15.0        | 7.0           | 21.3            |
| MN     | 91.3      | 1.8       | 6.9             | 4.4        | 10.8        | 6.6           | 33.8            |
| MO     | 92.4      | 3.6       | 4.0             | 2.9        | 16.6        | 8.1           | 21.0            |
| MS     | 55.4      | 41.6      | 3.0             | 2.4        | 24.1        | 9.5           | 29.1            |
| MT     | 88.4      | 0.3       | 11.3            | 3.1        | 14.2        | 3.8           | 66.4            |
| NC     | 72.3      | 20.4      | 7.3             | 7.2        | 17.5        | 9.6           | 24.5            |
| ND     | 88.9      | 1.1       | 10.0            | 2.9        | 10.6        | 4.4           | 52.9            |
| NE     | 94.4      | 0.9       | 4.7             | 6.7        | 11.0        | 5.5           | 43.2            |
| NH     | 94.3      | 1.3       | 4.4             | 2.5        | 9.2         | 5.7           | 24.3            |
| NJ     | 72.8      | 12.0      | 15.2            | 17.2       | 10.2        | 10.4          | 19.0            |
| NM     | 78.2      | 1.4       | 20.4            | 47.7       | 21.1        | 3.9           | 21.7            |
| NV     | 83.9      | 2.4       | 13.6            | 17.9       | 12.2        | 4.3           | 23.3            |
| NY     | 85.0      | 6.3       | 8.7             | 7.8        | 13.6        | 7.6           | 19.3            |
| OH     | 91.7      | 4.2       | 4.1             | 2.7        | 14.1        | 10.5          | 19.5            |
| OK     | 75.3      | 3.5       | 21.2            | 9.1        | 17.0        | 7.6           | 36.5            |
| OR     | 89.0      | 0.8       | 10.2            | 11.9       | 15.3        | 3.6           | 20.3            |
| PA     | 90.6      | 4.8       | 4.7             | 4.3        | 12.6        | 9.4           | 27.2            |
| RI     | 88.6      | 3.6       | 7.9             | 7.7        | 10.0        | 7.5           | 17.4            |
| SC     | 59.6      | 35.7      | 4.7             | 4.5        | 19.4        | 10.4          | 20.0            |
| SD     | 81.5      | 0.6       | 17.9            | 2.8        | 15.9        | 5.1           | 40.7            |
| TN     | 88.8      | 7.4       | 3.9             | 3.5        | 17.9        | 10.0          | 20.1            |
| TX     | 83.9      | 6.3       | 9.8             | 34.8       | 16.1        | 7.3           | 27.6            |
| UT     | 90.8      | 0.5       | 8.6             | 9.1        | 11.9        | 4.3           | 21.5            |
| VA     | 74.9      | 18.7      | 6.4             | 5.3        | 14.2        | 9.3           | 24.8            |

|    |      |     |      |      |      |     |      |
|----|------|-----|------|------|------|-----|------|
| VT | 95.3 | 1.0 | 3.7  | 1.8  | 11.3 | 5.6 | 17.1 |
| WA | 83.8 | 1.4 | 14.8 | 14.2 | 14.2 | 4.3 | 27.8 |
| WI | 91.4 | 1.7 | 6.9  | 3.7  | 11.5 | 7.3 | 21.4 |
| WV | 95.2 | 2.4 | 2.3  | 1.2  | 18.4 | 9.2 | 25.7 |
| WY | 92.6 | 0.5 | 6.9  | 8.2  | 11.5 | 3.8 | 39.1 |

#### Supplementary Material 4: Disease mapping

The model used for disease mapping of county-level data was:

$$Y \sim Po(E \times \theta) \quad (4)$$

$$\log(\theta_i) = \alpha + \sigma_i + u_i + v_i \quad (5)$$

where  $\alpha$  denotes the overall risk level,  $\sigma$  is a state-level random effect,  $u$  is a spatially correlated random effect modeled as conditionally autoregressive, and  $v$  is a non-spatial random effect.

**Table S4.** Relative risk by state.

| State     | Region      | RR, CI: [2.5%, 97.5%]    |
|-----------|-------------|--------------------------|
| <b>AK</b> | <b>West</b> | <b>0.25</b> (0.13, 0.46) |
| AL        | South       | 0.96 (0.57, 1.62)        |
| AR        | South       | 1.30 (0.80, 2.15)        |
| AZ        | West        | 3.09 (1.52, 6.36)        |
| CA        | West        | 0.94 (0.45, 1.95)        |
| CO        | West        | 1.12 (0.63, 2.01)        |
| CT        | North-East  | 1.75 (0.77, 3.93)        |
| DC        | South       | 1.15 (0.38, 3.54)        |
| DE        | South       | 1.25 (0.53, 2.96)        |
| FL        | South       | 1.17 (0.61, 2.24)        |
| GA        | South       | 1.54 (0.92, 2.61)        |
| HI        | West        | 0.18 (0.07, 0.45)        |
| IA        | Midwest     | 1.87 (1.13, 3.11)        |
| ID        | West        | 1.70 (0.89, 3.26)        |
| IL        | Midwest     | 1.31 (0.82, 2.12)        |
| IN        | Midwest     | 1.92 (1.18, 3.15)        |
| KS        | Midwest     | 0.99 (0.59, 1.67)        |
| KY        | South       | 1.02 (0.65, 1.62)        |
| LA        | South       | 2.19 (1.27, 3.83)        |
| MA        | North-East  | 3.05 (1.51, 6.08)        |
| MD        | South       | 0.92 (0.52, 1.64)        |
| ME        | North-East  | 0.83 (0.27, 2.48)        |
| MI        | Midwest     | 1.44 (0.73, 2.84)        |
| MN        | Midwest     | 1.26 (0.72, 2.22)        |
| MO        | Midwest     | 0.89 (0.56, 1.41)        |
| MS        | South       | 1.76 (1.05, 2.97)        |
| MT        | West        | 1.06 (0.53, 2.13)        |
| NC        | South       | 0.85 (0.52, 1.42)        |
| ND        | Midwest     | 1.60 (0.79, 3.25)        |
| NE        | Midwest     | 1.09 (0.63, 1.89)        |
| NH        | North-East  | 0.84 (0.36, 1.89)        |
| NJ        | North-East  | 1.33 (0.68, 2.61)        |
| NM        | West        | 0.94 (0.51, 1.72)        |
| NV        | West        | 1.42 (0.69, 2.94)        |

|    |            |      |       |   |       |
|----|------------|------|-------|---|-------|
| NY | North-East | 1.02 | (0.57 | , | 1.82) |
| OH | Midwest    | 1.64 | (1.00 | , | 2.70) |
| OK | South      | 0.98 | (0.57 | , | 1.68) |
| OR | West       | 1.15 | (0.56 | , | 2.37) |
| PA | North-East | 0.83 | (0.50 | , | 1.38) |
| RI | North-East | 0.04 | (0.01 | , | 0.13) |
| SC | South      | 1.55 | (0.87 | , | 2.78) |
| SD | Midwest    | 0.98 | (0.54 | , | 1.77) |
| TN | South      | 1.02 | (0.66 | , | 1.60) |
| TX | South      | 1.80 | (1.07 | , | 3.04) |
| UT | West       | 0.58 | (0.29 | , | 1.15) |
| VA | South      | 1.11 | (0.68 | , | 1.80) |
| VT | North-East | 0.57 | (0.25 | , | 1.28) |
| WA | West       | 1.15 | (0.54 | , | 2.43) |
| WI | Midwest    | 0.84 | (0.47 | , | 1.51) |
| WV | South      | 0.87 | (0.51 | , | 1.47) |
| WY | West       | 0.11 | (0.03 | , | 0.28) |

## References

1. Niedzwiedz, C.L.; Donnell, C.A.; Jani, B.D.; Demou, E.; Ho, F.K.; Celis-Morales, C.; Nicholl, B.I.; Mair, F.; Welsh, P.; Sattar, N.; et al. Ethnic and socioeconomic differences in SARS-CoV-2 infection: Prospective cohort study using UK Biobank. *medRxiv* **2020**, *18*, 1-14, doi:10.1101/2020.04.22.20075663.
2. Williamson, E.; Walker, A.J.; Bhaskaran, K.J.; Bacon, S.; Bates, C.; Morton, C.E.; Curtis, H.J.; Mehrkar, A.; Evans, D.; Inglesby, P.; et al. OpenSAFELY: Factors associated with COVID-19-related hospital death in the linked electronic health records of 17 million adult NHS patients. *medRxiv* **2020**, doi:10.1101/2020.05.06.20092999. Available online: <https://www.medrxiv.org/content/10.1101/2020.05.06.20092999v1> (accessed on 10 May 2020)
3. Halpin, D.M.G.; Faner, R.; Sibila, O.; Badia, J.R.; Agusti, A. Do chronic respiratory diseases or their treatment affect the risk of SARS-CoV-2 infection? *Lancet Respir. Med.* **2020**, *8*, 436–438, doi:10.1016/S2213-2600(20)30167-3.
4. Pansini, R.; Fornacca, D. Initial evidence of higher morbidity and mortality due to SARS-CoV-2 in regions with lower air quality. *medRxiv* **2020**, doi:10.1101/2020.04.04.20053595. Available online: <https://www.medrxiv.org/content/medrxiv/early/2020/04/07/2020.04.04.20053595.full.pdf> (accessed on 10 May 2020).
5. Fattorini, D.; Regoli, F. Role of the atmospheric pollution in the Covid-19 outbreak risk in Italy. *medRxiv* **2020**, *264*, 114732, doi:10.1101/2020.04.23.20076455.
6. Team CC-R. Preliminary Estimates of the Prevalence of Selected Underlying Health Conditions Among Patients with Coronavirus Disease 2019. *MMWR Morb Mortal Wkly Rep*; **2020**; *69*, 382–386. doi:10.15585/mmwr.mm6913e2
7. Bureau C. How the Census Bureau Measures Poverty. U.S. Census Bureau, Available online: <https://www.census.gov/topics/income-poverty/poverty/guidance/poverty-measures.html> Accessed 05/11/2020 (accessed on 5 November 2020).
6. Centers for Disease Control and Prevention, National Center for Health Statistics. Underlying Cause of Death 1999–2018 on CDC WONDER Online Database, Released in 2020. Available online: <http://wonder.cdc.gov/ucd-icd10.html> (accessed on 26 April 2020).
7. van Donkelaar, A.; Martin, R.V.; Li, C.; Burnett, R.T. Regional Estimates of Chemical Composition of Fine Particulate Matter Using a Combined Geoscience-Statistical Method with Information from Satellites, Models, and Monitors. *Environ. Sci. Technol.* **2019**, *53*, 2595–2611, doi:10.1021/acs.est.8b06392.
